# Supplementary material
Source: PubMed Central journal article supplement (PMC5373963)

## **Supplementary Materials**

**Supplementary Table 1. Association of the identified SNPs with other metabolic traits**

**Supplementary Table 2. Association of BMI associated SNPs with BFM**

**Supplementary Table 3. Association of the BFP associated SNPs with BFM**

**Supplementary Figure 1. Linkage disequilibrium patterns of the associated SNPs**

**Supplementary Figure 2. Gene expression profiles in the GTEx project**

**Supplementary Figure 3. Chromatin state of the 20p11 locus**

Supplementary Table 1. Association of the identified SNPs with other metabolic traits

| Trait          | Study     | <i>rs12481515</i> |                 | <i>rs16981092</i> |                 | <i>rs2069126</i> |                 | <i>rs6046308</i> |                 | <i>rs910983</i> |                 |
|----------------|-----------|-------------------|-----------------|-------------------|-----------------|------------------|-----------------|------------------|-----------------|-----------------|-----------------|
|                |           | ED(t)             | p               | ED(a)             | p               | ED(a)            | p               | ED(t)            | p               | ED(t)           | p               |
| BFM            | Current   | -                 | <b>4.48E-08</b> | +                 | <b>3.49E-09</b> | -                | <b>1.82E-09</b> | +                | <b>3.74E-08</b> | +               | <b>4.94E-09</b> |
| BFP            | Lu et al. | -                 | 0.09            | +                 | 0.26            | -                | 0.22            | +                | <b>0.03</b>     | +               | 0.51            |
| BMI            | GIANT     | -                 | 0.44            | +                 | 0.98            | -                | 0.98            | +                | 0.35            | 0               | 1.00            |
| WHR            | GIANT     | +                 | 0.99            | +                 | 0.91            | +                | 0.83            | -                | 0.50            | +               | 0.90            |
| fastingGlucose | MAGIC     | +                 | 0.31            | -                 | 0.27            | +                | 0.48            | -                | 0.43            | -               | 0.29            |
| 2hrGlucose_BMI | MAGIC     | +                 | 0.06            | -                 | 0.59            | +                | 0.68            | -                | 0.34            | -               | 0.49            |
| LIPIDS         | LIPIDS    | +                 | 0.16            | -                 | <b>0.05</b>     | +                | <b>0.05</b>     | -                | 0.08            | NA              | NA              |
| T2D            | DIAGRAM   | +                 | 0.41            | -                 | 0.17            | +                | 0.19            | -                | 0.35            | 0               | 0.99            |

Notes: BFM, body fat mass; BFP, body fat percentage; BMI, body mass index; WHR, waist-hip-ratio; fastingGlucose, fasting glucose; 2hrGhocose\_BMI, two hour glucose adjusted by BMI; LIPIDS, lipids; T2D, type 2 diabetes; ED, effect direction; Alleles in bracket were effect allele. Na, not available.

Supplementary Table 2. Association of BMI associated SNPs with BFM

| SNP               | EA | OA | BMI |           | BFM |                 |
|-------------------|----|----|-----|-----------|-----|-----------------|
|                   |    |    | ED  | p         | ED  | p               |
| <i>rs1000940</i>  | G  | A  | +   | 1.00E-08  | +   | 0.15            |
| <i>rs10132280</i> | A  | C  | -   | 1.00E-11  | +   | 0.38            |
| <i>rs1016287</i>  | T  | C  | +   | 4.00E-12  | +   | <b>0.04</b>     |
| <i>rs10182181</i> | A  | G  | -   | 8.00E-26  | -   | 0.17            |
| <i>rs10733682</i> | A  | G  | +   | 2.00E-10  | +   | 0.91            |
| <i>rs10938397</i> | A  | G  | -   | 1.00E-40  | -   | 0.28            |
| <i>rs10968576</i> | G  | A  | +   | 2.00E-14  | +   | 0.21            |
| <i>rs11030104</i> | A  | G  | +   | 7.00E-30  | -   | 0.68            |
| <i>rs11057405</i> | A  | G  | -   | 1.00E-08  | +   | 0.13            |
| <i>rs11126666</i> | G  | A  | -   | 1.00E-09  | -   | 0.94            |
| <i>rs11165643</i> | C  | T  | -   | 1.00E-13  | -   | <b>0.01</b>     |
| <i>rs11191560</i> | T  | C  | -   | 2.00E-09  | +   | 0.20            |
| <i>rs1121980</i>  | A  | G  | +   | 4.00E-08  | +   | 0.09            |
| <i>rs11583200</i> | C  | T  | +   | 6.00E-09  | +   | <b>4.29E-03</b> |
| <i>rs1167827</i>  | A  | G  | -   | 2.00E-10  | +   | 0.55            |
| <i>rs11688816</i> | A  | G  | -   | 2.00E-08  | -   | <b>0.04</b>     |
| <i>rs11727676</i> | C  | T  | -   | 6.00E-09  | -   | 0.72            |
| <i>rs11847697</i> | T  | C  | +   | 4.00E-09  | -   | 0.51            |
| <i>rs12286929</i> | G  | A  | +   | 5.00E-13  | -   | 0.56            |
| <i>rs12401738</i> | A  | G  | +   | 1.00E-10  | +   | 0.18            |
| <i>rs12429545</i> | G  | A  | -   | 3.00E-13  | -   | 0.81            |
| <i>rs12446632</i> | A  | G  | -   | 2.00E-19  | -   | <b>0.05</b>     |
| <i>rs12566985</i> | G  | A  | +   | 2.00E-15  | +   | 0.36            |
| <i>rs12885454</i> | C  | A  | +   | 9.00E-11  | +   | 0.59            |
| <i>rs12940622</i> | A  | G  | -   | 4.00E-10  | -   | 0.88            |
| <i>rs12970134</i> | A  | G  | +   | 1.00E-12  | +   | 0.31            |
| <i>rs13021737</i> | A  | G  | -   | 5.00E-54  | -   | <b>0.01</b>     |
| <i>rs13078960</i> | T  | G  | -   | 1.00E-14  | +   | 0.28            |
| <i>rs13107325</i> | C  | T  | -   | 1.00E-12  | -   | 0.15            |
| <i>rs13191362</i> | A  | G  | +   | 1.00E-09  | -   | 0.19            |
| <i>rs13201877</i> | A  | G  | -   | 4.00E-08  | +   | 0.53            |
| <i>rs1441264</i>  | A  | G  | +   | 3.00E-08  | +   | 0.20            |
| <i>rs1460676</i>  | T  | C  | -   | 5.00E-08  | +   | 0.31            |
| <i>rs1516725</i>  | T  | C  | -   | 1.00E-24  | -   | 0.38            |
| <i>rs1528435</i>  | T  | C  | +   | 5.00E-09  | +   | 0.39            |
| <i>rs1558902</i>  | A  | T  | +   | 1.00E-156 | +   | <b>0.04</b>     |
| <i>rs16851483</i> | G  | T  | -   | 2.00E-10  | -   | 0.14            |
| <i>rs16907751</i> | C  | T  | +   | 4.00E-08  | +   | 0.80            |
| <i>rs16951275</i> | C  | T  | -   | 2.00E-18  | +   | 0.39            |
| <i>rs17001654</i> | C  | G  | -   | 5.00E-09  | +   | 0.48            |

|                   |   |   |   |          |   |                 |
|-------------------|---|---|---|----------|---|-----------------|
| <i>rs17024393</i> | C | T | + | 7.00E-14 | + | 0.59            |
| <i>rs17094222</i> | C | T | + | 2.00E-11 | + | 0.71            |
| <i>rs17203016</i> | G | A | + | 3.00E-08 | + | 0.36            |
| <i>rs17405819</i> | C | T | - | 1.00E-11 | - | 0.20            |
| <i>rs17724992</i> | A | G | + | 8.00E-09 | - | 0.91            |
| <i>rs17782313</i> | C | T | + | 3.00E-15 | + | 0.47            |
| <i>rs1808579</i>  | T | C | - | 1.00E-08 | - | 0.76            |
| <i>rs1928295</i>  | C | T | - | 3.00E-11 | + | 0.63            |
| <i>rs2033732</i>  | C | T | + | 5.00E-08 | + | 0.43            |
| <i>rs205262</i>   | A | G | - | 2.00E-10 | - | 0.36            |
| <i>rs2075650</i>  | A | G | + | 3.00E-09 | - | 0.96            |
| <i>rs2080454</i>  | A | C | - | 9.00E-09 | - | 0.89            |
| <i>rs2112347</i>  | G | T | - | 2.00E-17 | + | 0.63            |
| <i>rs2121279</i>  | T | C | + | 2.00E-08 | + | 0.82            |
| <i>rs2176040</i>  | G | A | - | 1.00E-08 | - | <b>2.66E-04</b> |
| <i>rs2176598</i>  | T | C | + | 3.00E-08 | + | 0.47            |
| <i>rs2207139</i>  | G | A | + | 8.00E-31 | + | 0.47            |
| <i>rs2245368</i>  | T | C | - | 3.00E-08 | + | 0.40            |
| <i>rs2287019</i>  | C | T | + | 2.00E-18 | + | 0.94            |
| <i>rs2365389</i>  | C | T | + | 1.00E-10 | - | 0.41            |
| <i>rs2568958</i>  | G | A | - | 1.00E-11 | - | <b>0.01</b>     |
| <i>rs2650492</i>  | A | G | + | 1.00E-09 | + | 1.00            |
| <i>rs2820292</i>  | A | C | - | 2.00E-10 | - | 0.77            |
| <i>rs2836754</i>  | C | T | + | 2.00E-08 | + | 0.11            |
| <i>rs29941</i>    | A | G | - | 7.00E-12 | + | 0.11            |
| <i>rs3101336</i>  | T | C | - | 3.00E-26 | - | <b>0.01</b>     |
| <i>rs3736485</i>  | A | G | + | 7.00E-09 | + | 0.24            |
| <i>rs3810291</i>  | A | G | + | 6.00E-16 | + | 0.65            |
| <i>rs3817334</i>  | C | T | - | 1.00E-17 | + | 0.99            |
| <i>rs3849570</i>  | A | C | + | 2.00E-08 | + | 0.62            |
| <i>rs3888190</i>  | A | C | + | 3.00E-25 | - | 0.98            |
| <i>rs4256980</i>  | G | C | + | 8.00E-12 | + | 0.55            |
| <i>rs4740619</i>  | T | C | + | 5.00E-09 | + | 0.32            |
| <i>rs492400</i>   | T | C | - | 7.00E-09 | + | 0.44            |
| <i>rs543874</i>   | G | A | + | 2.00E-40 | + | 0.21            |
| <i>rs6091540</i>  | C | T | + | 2.00E-11 | + | 0.47            |
| <i>rs62033400</i> | G | A | + | 2.00E-14 | + | <b>0.05</b>     |
| <i>rs6265</i>     | C | T | + | 5.00E-10 | + | 0.96            |
| <i>rs6465468</i>  | G | T | - | 5.00E-08 | - | 0.91            |
| <i>rs6477694</i>  | C | T | + | 2.00E-08 | - | 0.53            |
| <i>rs6499640</i>  | A | G | + | 4.00E-13 | + | 0.54            |
| <i>rs6567160</i>  | C | T | + | 7.00E-59 | + | 0.59            |
| <i>rs657452</i>   | A | G | + | 2.00E-13 | + | <b>0.01</b>     |
| <i>rs6804842</i>  | A | G | - | 8.00E-10 | - | 0.20            |

|                  |   |   |   |          |   |                 |
|------------------|---|---|---|----------|---|-----------------|
| <i>rs7138803</i> | G | A | - | 5.00E-26 | - | <b>0.01</b>     |
| <i>rs7141420</i> | T | C | + | 9.00E-15 | - | 0.77            |
| <i>rs7164727</i> | T | C | + | 4.00E-09 | - | 0.79            |
| <i>rs7239883</i> | G | A | + | 2.00E-08 | + | <b>0.03</b>     |
| <i>rs7243357</i> | G | T | - | 9.00E-09 | - | 0.41            |
| <i>rs7498665</i> | G | A | + | 3.00E-10 | + | 1.00            |
| <i>rs7561317</i> | A | G | - | 4.00E-17 | - | <b>0.01</b>     |
| <i>rs758747</i>  | C | T | - | 2.00E-10 | - | 0.10            |
| <i>rs7599312</i> | G | A | + | 5.00E-11 | + | 0.44            |
| <i>rs7647305</i> | T | C | - | 7.00E-11 | - | 0.39            |
| <i>rs7715256</i> | G | T | + | 9.00E-09 | + | 0.34            |
| <i>rs7899106</i> | A | G | - | 1.00E-08 | - | 0.52            |
| <i>rs7903146</i> | T | C | - | 1.00E-12 | + | 0.37            |
| <i>rs8050136</i> | A | C | + | 1.00E-47 | + | <b>0.04</b>     |
| <i>rs925946</i>  | T | G | + | 9.00E-10 | + | 0.64            |
| <i>rs929641</i>  | A | G | + | 5.00E-08 | + | 0.59            |
| <i>rs9374842</i> | T | C | + | 7.00E-09 | + | <b>0.05</b>     |
| <i>rs9400239</i> | C | T | + | 2.00E-08 | + | 0.39            |
| <i>rs9540493</i> | G | A | - | 4.00E-09 | - | 0.89            |
| <i>rs977747</i>  | T | G | + | 2.00E-08 | + | 0.56            |
| <i>rs9914578</i> | G | C | + | 2.00E-08 | - | 0.83            |
| <i>rs9925964</i> | G | A | - | 9.00E-11 | - | <b>3.66E-04</b> |
| <i>rs9939609</i> | A | T | + | 2.00E-20 | + | 0.06            |

Notes: SNPs with inconsistent effect directions were marked in gray. Nominally significant

p-values in BFM were marked in bold.

Supplementary Table 3. Association of the BFP associated SNPs with BFM

| SNP              | EA | OA | BFP |          | BFM |                 |
|------------------|----|----|-----|----------|-----|-----------------|
|                  |    |    | ED  | p        | ED  | p               |
| <i>rs1558902</i> | A  | T  | +   | 3.80E-27 | +   | <b>0.04</b>     |
| <i>rs2943652</i> | C  | T  | +   | 1.50E-12 | +   | <b>4.17E-04</b> |
| <i>rs6567160</i> | C  | T  | +   | 1.30E-10 | +   | 0.59            |
| <i>rs6755502</i> | C  | T  | +   | 1.40E-10 | +   | <b>0.01</b>     |
| <i>rs6738627</i> | A  | G  | +   | 5.70E-09 | +   | <b>3.42E-03</b> |
| <i>rs693839</i>  | C  | T  | +   | 6.60E-09 | +   | 0.25            |
| <i>rs6857</i>    | C  | T  | +   | 6.80E-09 | -   | 0.40            |
| <i>rs4788099</i> | G  | A  | +   | 1.20E-08 | -   | 1.00            |
| <i>rs9906944</i> | C  | T  | +   | 2.90E-08 | +   | 0.08            |
| <i>rs543874</i>  | G  | A  | +   | 4.50E-08 | +   | 0.21            |
| <i>rs2943650</i> | C  | T  | +   | 6.00E-09 | +   | <b>3.40E-04</b> |
| <i>rs534870</i>  | G  | A  | +   | 3.20E-08 | +   | 0.39            |
| <i>rs8050136</i> | A  | C  | +   | 5.60E-25 | +   | <b>0.04</b>     |







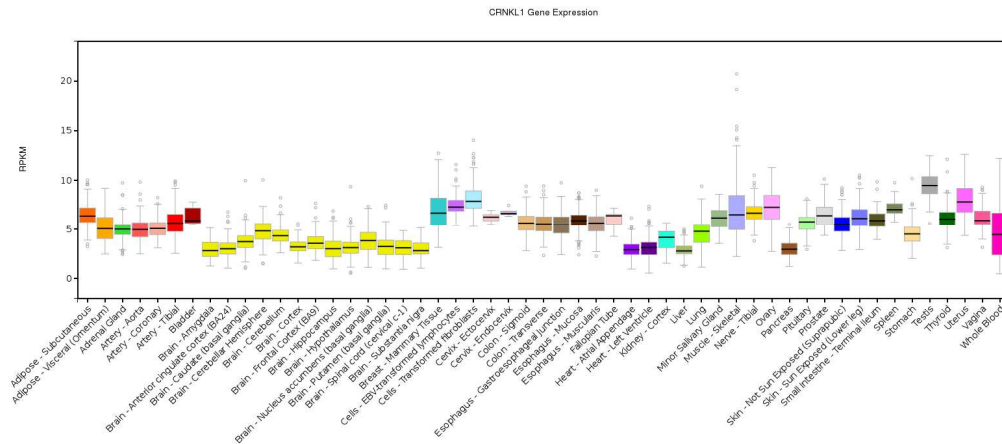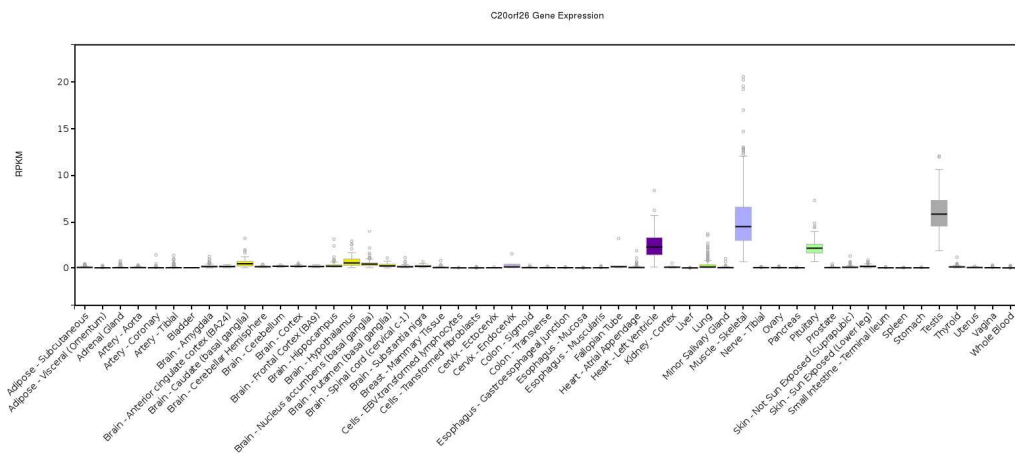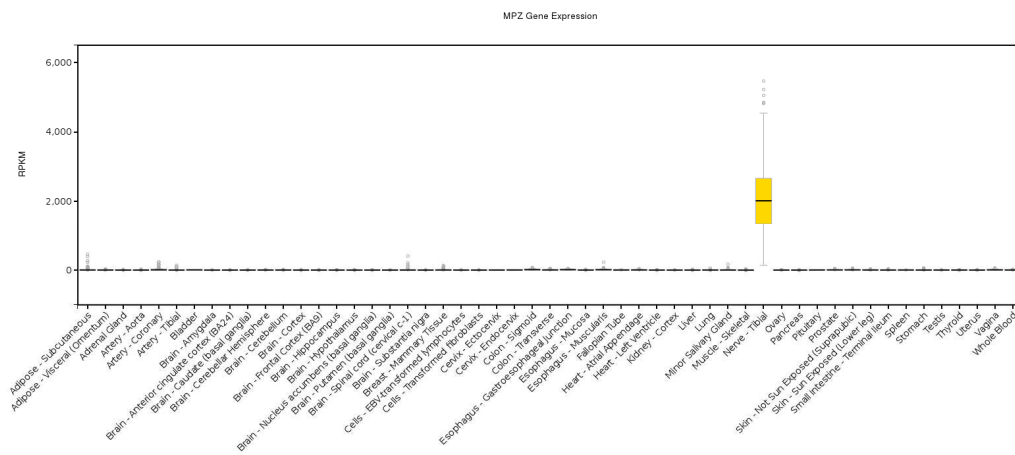

Supplementary Figure 3. Chromatin state of the 20p11 locus

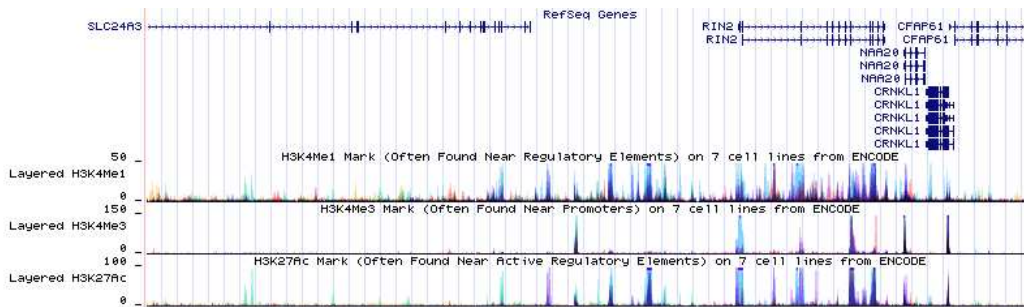

Supplement: NIHMS840622-supplement-01.pdf [file NIHMS840622-supplement-01.pdf]
